# Supplementary material for: Health-Enabling Technologies to Assist Patients With Musculoskeletal Shoulder Disorders When Exercising at Home: Scoping Review
Source: PubMed Central journal article supplement (PMC8294637; doi:10.2196/21107), 2021-02-04
Supplement: rehab_v8i1e21107_app3.pdf [file rehab_v8i1e21107_app3.pdf]

## Overview of identified articles and related health-enabling technologies with telerehabilitation aspects

| Name of health-enabling technology | Study                                  | Details                                      |                                                                                                                               |
|------------------------------------|----------------------------------------|----------------------------------------------|-------------------------------------------------------------------------------------------------------------------------------|
| <b>Telerehabilitation</b>          |                                        |                                              |                                                                                                                               |
|                                    | Kinect-based telerehabilitation system | Anton et al [18,19]                          | App; telerehabilitation with Kinect-based exercise guidance and therapist decision support                                    |
|                                    | Unstated                               | Macias-Hernandez et al [20]                  | App; telerehabilitation with video recording and written feedback                                                             |
|                                    | iJoint App                             | Ongvisatepaiboon et al [21-23]               | App; telerehabilitation with smartphone IMU <sup>a</sup>                                                                      |
|                                    | Unstated                               | Pastora-Bernal et al [24,25]                 | App; telerehabilitation with web-based exercise program (shows video, images, and parameters)                                 |
|                                    | TeRa                                   | Cabana et al [26];<br>Tousignant et al [27]  | Telerehabilitation with biomedical sensors                                                                                    |
|                                    | Unstated                               | Eriksson et al [28,29]                       | Telerehabilitation with a videoconferencing system                                                                            |
|                                    | Unstated                               | Budziszewski [30]                            | Game; app; telerehabilitation with head-mounted display, body-wearable controller (Razer Hydra), and videoconferencing system |
|                                    | SHOULPHY app                           | Carbonaro et al [31];<br>Lucchesi et al [32] | Game; app; telerehabilitation with IMUs                                                                                       |
|                                    | Unstated                               | Chang et al [33,34]                          | Game; app; telerehabilitation with shoulder wheel with control module                                                         |

|  |                                            |                                   |                                                                                     |
|--|--------------------------------------------|-----------------------------------|-------------------------------------------------------------------------------------|
|  | iJoint                                     | Chiensriwimol et al [35,36]       | Game; app; telerehabilitation with smartphone IMUs and audio-biofeedback module     |
|  | MoMo                                       | Chung and Chen [37]               | Game; app; telerehabilitation with wearable devices not specified                   |
|  | InMotion                                   | Pinto et al [38]                  | Game; app; telerehabilitation with Kinect-based exercise guidance                   |
|  | Unstated                                   | Postolache et al [39]             | Game; app; telerehabilitation with Kinect-based exercise guidance                   |
|  | Unstated                                   | Postolache et al [40]             | Game; app; telerehabilitation with Kinect-based exercise guidance                   |
|  | GEAR                                       | Rahman et al [41,42]              | Game; app; telerehabilitation with IMUs                                             |
|  | PARC                                       | Symeonidis and Kavallieratou [43] | Game; app; telerehabilitation with Kinect-based exercise guidance                   |
|  | Unstated                                   | Viegas et al [44]                 | Game; app; telerehabilitation with Kinect- and IMU-based exercise guidance          |
|  | Cloud motion-sensing rehabilitation system | Yeh et al [45]                    | Game; app; telerehabilitation with Kinect- and IMU-based exercise guidance          |
|  | Unstated                                   | Ying and Aimin [46]               | Game; app; telerehabilitation with marker-based augmented reality exercise guidance |

| <b>Telerehabilitation planned</b> |                                    |                           |                                                                                    |
|-----------------------------------|------------------------------------|---------------------------|------------------------------------------------------------------------------------|
|                                   | Unstated                           | Huang et al [47]          | Game; app                                                                          |
|                                   | Unstated                           | Mangal et al [48]         | Game; app                                                                          |
|                                   | Unstated                           | Yeh et al [49]            | Game; app                                                                          |
|                                   | BANDCIZER (TM)                     | McGirr et al [50]         | Monitoring only                                                                    |
|                                   | GoNet v2                           | Neto et al [51]           | Monitoring only                                                                    |
|                                   | Unstated                           | Uttarwar and Mishra [52]  | Monitoring only                                                                    |
|                                   | I-FLEXBAR                          | Shieh et al [53]          | Flexbar pressure sensor-based exercise feedback; telerehabilitation planned        |
| <b>No telerehabilitation</b>      |                                    |                           |                                                                                    |
|                                   | Unstated                           | Choi et al [54]           | App; smartphone-based exercise guidance and IMU-based angle feedback               |
|                                   | Shoulder physiotherapy application | Cubukcu and Yuzgec [55]   | App; video-based exercise instruction; Kinect-based feedback                       |
|                                   | Unstated                           | Dahl-Popolizio et al [56] | App; playful tasks                                                                 |
|                                   | ZOUZI                              | Du et al [57]             | App; IMU-based exercise feedback                                                   |
|                                   | Unstated                           | Stütz et al [58]          | App; video-based exercise instruction; IMU-based range of motion measurement       |
|                                   | Zishi                              | Wang et al [59]           | App; IMU-, smart garment-, and modular soft sensor-based exercise guidance         |
|                                   | Unstated                           | Quevedo et al [60]        | App; playful tasks                                                                 |
|                                   | Unstated                           | Chen [61]                 | Playful tasks with virtual (Kinect-based) finger ladder and single curved shoulder |

|  |                                                          |                                             |                                              |
|--|----------------------------------------------------------|---------------------------------------------|----------------------------------------------|
|  | Unstated                                                 | Arif et al [62]                             | Game; app                                    |
|  | 2012 unstated; 2016<br>MirrARbilitation                  | Da Gama et al [63-65]                       | Game; app; Kinect-based<br>exercise guidance |
|  | Unstated                                                 | Du et al [66]                               | Game; app                                    |
|  | Unstated                                                 | Fernandez-Cervantes et<br>al [67]           | Game; app                                    |
|  | The Sorcerer's Apprentice                                | Fikar et al [68]                            | Game; app                                    |
|  | KineActiv R                                              | Muñoz et al [69]                            | Game; app                                    |
|  | Unstated                                                 | Nava et al [70]                             | Game; app                                    |
|  | Commercial (Wii Sports)                                  | Pekyavas and Ergun [71]                     | Game; app                                    |
|  | Unstated                                                 | Powell and Powell [72]                      | Game; app                                    |
|  | Commercial (Wii sports)                                  | Rizzo et al [73]                            | Game; app                                    |
|  | Unstated                                                 | Shi and Peng [74]                           | Game; app                                    |
|  | Commercial Xbox 360 Kinect                               | Wiederhold and<br>Wiederhold [75]           | Game; app                                    |
|  | Unstated                                                 | Yin and Xu [76]                             | Game; app                                    |
|  | Commercial Xbox 360 Kinect                               | Arman et al [77]                            | Game                                         |
|  | Rehabilitation gaming system                             | Chen et al [78]                             | Game                                         |
|  | Unstated                                                 | Gorsic and Novak [79];<br>Gorsic et al [80] | Game                                         |
|  | Unstated                                                 | Gutiérrez et al [81]                        | Game                                         |
|  | Unstated                                                 | Kanbe et al [82]                            | Game                                         |
|  | Commercial interactive<br>rehabilitation exercise system | Sveistrup et al [83]                        | Game                                         |
|  | Unstated                                                 | Ar and Akgul [84]                           | Monitoring only                              |
|  | Unstated                                                 | Chen et al [85]                             | Monitoring only                              |
|  | Unstated                                                 | Chiang et al [86]                           | Monitoring only                              |
|  | Unstated                                                 | Tekriwal and Pandian<br>[87]                | Monitoring only                              |

<sup>a</sup>IMU: inertial measurement unit
